# Supplementary material
Source: Research Square preprint supplement (doi:10.21203/rs.3.rs-9030926/v1)
Supplement: Supplementary file 1 [file 7098911917e5e20723a2450f.docx]

**KAP-Based Questionnaire for Evaluating BOPPPS Training Effectiveness Among Clinical Teachers**

**Dear Clinical Teacher,**

To scientifically evaluate the effectiveness of the BOPPPS instructional model training and to continuously improve our faculty development programs, we sincerely invite you to participate in this survey. You have previously attended the BOPPPS workshop organized by Jining Medical University, and your valuable experience is crucial to us.

Your participation is completely voluntary. If you are willing to participate, please continue with the questionnaire; if not, you may exit now.

This questionnaire is anonymous. All data will be used solely for aggregate analysis and academic research, and will be kept strictly confidential. It will take approximately 12-15 minutes to complete.

We greatly appreciate your support and cooperation! Your insights are vital to advancing medical education.

### ****Part I: Demographic Characteristics****

1. Gender:

A. Male

B. Female

1. Your hospital name: ____________________
2. Professional title:

A. Resident physician

B. Attending physician

C. Associate chief physician

1. Clinical department: ___________________
2. Years of clinical teaching experience:

A. ≤5 years

B. 6-10 years

C. >10 years

### ****Part II: Knowledge Assessment****

**Instructions:** This section aims to assess your understanding of the core components of the BOPPPS instructional model.

**K1. Please arrange the six BOPPPS components in the correct logical order:**
A. Participatory Learning
B. Pre-assessment
C. Bridge-in
D. Summary
E. Learning Objective
F. Post-assessment

Your order: (Please fill in the letters in sequence, e.g., C, E, B, ...) **______**

**K2. Please match each description below with the correct BOPPPS component:** (Write the corresponding letter in the parentheses)

Component options:

A. Bridge-in

B. Learning Objective

C. Pre-assessment

D. Participatory Learning

E. Post-assessment

F. Summary

| **Description** | **Component** |
| --- | --- |
| Using questions or quizzes to understand students’ prior knowledge of the new content. | ( ) |
| Clearly informing students of the knowledge, skills, or attitudes they should acquire by the end of the lesson. | ( ) |
| Engaging students actively in the learning process through case discussions, role-plays, simulations, etc. | ( ) |
| Using vivid clinical cases, videos, or questions to stimulate students’ interest and motivation. | ( ) |
| Checking the achievement of lesson objectives through quizzes, skill assessments, or mini-clinical evaluations. | ( ) |
| Summarizing key knowledge points with students, building a knowledge framework, and connecting to future clinical practice. | ( ) |

### ****Part III: Attitudes and Beliefs****

**Instructions: Please indicate whether you agree or disagree with each statement based on your true feelings.**

| **Statement** | **Agree** | **Disagree** |
| --- | --- | --- |
| **B1.** The structured design of BOPPPS makes my teaching more logical and organized. |  |  |
| **B2.** I believe Participatory Learning can effectively enhance students’ clinical thinking and practical skills. |  |  |
| **B3.** The teaching loop formed by Pre-assessment and Post-assessment helps me adjust my teaching strategies in a timely manner. |  |  |
| **B4.** I believe the BOPPPS model better embodies the student-centered philosophy than traditional lecture-based teaching. |  |  |
| **B5.** I believe implementing the BOPPPS model in clinical teaching is worth the time and effort invested. |  |  |
| **B6.** I am willing to recommend the BOPPPS model to my colleagues. |  |  |
| **B7.** Overall, I am satisfied with the BOPPPS instructional model. |  |  |

### ****Part IV: Practice and Impact****

**Instructions:** This section investigates your application of the BOPPPS model in actual clinical teaching and its effects.

****P1.** Reflecting on your teaching practice before and after attending the BOPPPS workshop, how do you perceive changes in the following areas?** (Please select the most appropriate option for **before training** and **after training** for each row)

| **Teaching Aspect** | **Before Training** | **After Training** |
| --- | --- | --- |
| **P01** Structured and logical instructional design | A. Very illogical  B. Illogical  C. Neutral  D. Logical  E. Very logical | A. Very illogical  B. Illogical  C. Neutral  D. Logical  E. Very logical |
| **P02** Student participation and interaction in class | A. Very low  B. Low  C. Neutral  D. High  E. Very high | A. Very low  B. Low  C. Neutral  D. High  E. Very high |
| **P03** Ability to clearly set and communicate learning objectives | A. Very unclear  B. Unclear  C. Neutral  D. Clear  E. Very clear | A. Very unclear  B. Unclear  C. Neutral  D. Clear  E. Very clear |
| **P04** Frequency of using diverse teaching methods (e.g., cases, simulations) | A. Very low  B. Low  C. Neutral  D. High  E. Very high | A. Very low  B. Low  C. Neutral  D. High  E. Very high |
| **P05** Awareness and ability to conduct immediate assessment of learning | A. Very weak  B. Weak  C. Neutral  D. Strong  E. Very strong | A. Very weak  B. Weak  C. Neutral  D. Strong  E. Very strong |
| **P06** Overall teaching confidence and self-efficacy | A. Very low  B. Low  C. Neutral  D. High  E. Very high | A. Very low  B. Low  C. Neutral  D. High  E. Very high |

****P2.** Since attending the BOPPPS workshop, how often have you applied the BOPPPS model in your clinical teaching (e.g., clerkships, internships, mini-lectures, case discussions)?** (Select one)

A. Never used
B. Occasionally used (<30% of sessions)
C. Sometimes used (30%–60% of sessions)
D. Frequently used (>60% of sessions)
E. Used in almost every session

**P3.** Ha**ve you attempted to integrate the BOPPPS model with other advanced teaching models in your teaching practice? (Select all that apply)**

A. **Yes, I have integrated it with Case-Based Learning (CBL).
B. Yes, I have integrated it with Team-Based Learning (TBL).
C. Yes, I have integrated it with Problem-Based Learning (PBL).
D. Yes, I have integrated it with other models (please specify): ____________________**
E. No, I have only applied the standard BOPPPS model without integration with other models.

****P4.** Which component do you find most challenging to implement when applying the BOPPPS model? (Select one)**

**A. Bridge-in (difficult to design an engaging opening)
B. Learning Objective (difficult to formulate specific, measurable objectives)
C. Pre-assessment (difficult to quickly and effectively assess students’ starting point)
D. Participatory Learning (difficult to organize, time-consuming, students uncooperative)
E. Post-assessment (difficult to design effective immediate assessment tools)
F. Summary (difficult to effectively synthesize within limited time)
**P5.** What is the main barrier you encounter when applying the BOPPPS model? (Select one)**

**A. Heavy clinical workload, insufficient time for lesson preparation
B. Lack of appropriate teaching resources (e.g., case banks, simulation equipment)
C. Students’ difficulty adapting to or cooperating with the new teaching model
D. Limitations of teaching space or equipment
E. Lack of ongoing guidance and peer exchange
F. Insufficient understanding of BOPPPS, lack of confi**dence
G. Teaching evaluation system does not encourage such instructional innovations
H. Other (please specify): ____________________

****P6.** After applying the BOPPPS model, what positive changes have you observed in students?** (Select all that apply)

A. Classroom attention and participation significantly increased
B. Clinical case analysis skills enhanced
C. Mastery of practical skills faster and more solid
D. Increased willingness for self-directed learning and inquiry
E. Improved teamwork and communication skills
F. No significant changes observed
G. Other (please specify): ____________________

### ****Part V: Open-ended Questions****

****O1.** If you have integrated BOPPPS with other models (e.g., CBL/TBL), please briefly describe how you combined them and share the effects or challenges you experienced.**

____________________

****O2.** In your process of applying the BOPPPS model, which successful case or moment gave you the greatest sense of achievement? Please briefly describe.**

____________________

****O3.** To help you and your colleagues better apply the BOPPPS model, what support do you think the hospital or university could provide in the future?**

____________________

**Thank you very much for your support! Your insights will provide crucial scientific evidence for optimizing faculty development and advancing teaching reform.**

**Wishing you success and fulfillment in your teaching!**
